# Supplementary material for: Being overweight in early adulthood is associated with increased mortality in middle age
Source: PubMed Central journal article supplement (PMC5080549; doi:10.1038/srep36046), 2016-10-26

## Supplementary material

### Being overweight in early adulthood is associated with increased mortality in middle age

David Carslake<sup>1,2\*</sup>, Mona Jeffreys<sup>3</sup>, George Davey Smith<sup>1,2</sup>

<sup>1</sup>MRC Integrative Epidemiology Unit at the University of Bristol, Oakfield House, Oakfield Grove, Bristol BS8 2BN, UK. <sup>2</sup>School of Social and Community Medicine, University of Bristol, Oakfield House, Oakfield Grove, Bristol BS8 2BN, UK. <sup>3</sup>School of Social and Community Medicine, University of Bristol, Canynge Hall, 39 Whatley Road, Bristol BS8 2PS, UK.

\*Correspondence and requests for materials should be addressed to D. C. (email: David.Carslake@bristol.ac.uk).

Supplementary Table S1: Conversion of ICD codes into causes of death.

Supplementary Table S2. Baseline characteristics of participants by quartile of BMI in 2001.

Supplementary Table S3. Linear hazard ratios as in Table 2, but only adjusted for sex and date of birth (cubic splines).

Supplementary Table S4. Linear hazard ratios as in Table 2, but for men only.

Supplementary Table S5. Linear hazard ratios as in Table 2, but for women only.

Supplementary Table S6. Linear hazard ratios as in Table 2, but excluding BMIs outside the 5<sup>th</sup> - 95<sup>th</sup> percentiles.

Supplementary Table S7. Linear hazard ratios as in Table 2, but with follow-up beginning after a ten-year lag.

Supplementary Table S8. Hazard ratios by categories of BMI as in Table 3, but with follow-up beginning after a ten-year lag.

Supplementary Table S9. Linear hazard ratios as in Table 2, but with additional adjustment for father's social class, height (cubic splines), birth order, number of siblings, pulse rate and age at menarche.

Supplementary Table S10. Linear hazard ratios as in Table 2, but excluding those missing smoking data.

Supplementary Table S11. Linear hazard ratios as in Table 2, showing effects of restriction to (i) healthy non-smokers, (ii) healthy subjects and (iii) non-smokers, at age 20.

Supplementary Figure S1. Hazard ratios relative to the first quartile, for quartiles of BMI at age 20.

Supplementary Figure S2. Hazard ratios relative to the first quartile, for quartiles of BMI in 2001.

Supplementary Figure S3. Fitted quadratic hazard ratios as in Fig. 2, but excluding BMIs outside the 5<sup>th</sup> - 95<sup>th</sup> percentiles.

Supplementary Figure S4. Fitted quadratic hazard ratios as in Fig. 2, but with follow-up beginning after a ten-year lag.

Supplementary Figure S5. Fitted quadratic hazard ratios as in Fig. 2, but with additional adjustment for father's social class, height (cubic splines), birth order, number of siblings, pulse rate and age at menarche.

Supplementary Figure S6. Fitted quadratic hazard ratios as in Fig. 2, but excluding those missing smoking data.

**Supplementary Table S1. Conversion of International Statistical Classification of Diseases and Related Health Problems (ICD) codes into causes of death.** ICD 9 was used exclusively for deaths occurring until 31<sup>st</sup> December 2000 and ICD10 for deaths occurring from 1<sup>st</sup> November 2000, with a ten-month transition period between.

| <b>Cause of death</b>      | <b>ICD 9</b>                                                | <b>ICD 10</b>                                               |
|----------------------------|-------------------------------------------------------------|-------------------------------------------------------------|
| All cause                  | all                                                         | all                                                         |
| Cardiovascular disease     | 3900-4599                                                   | I000-I999; G450-G459                                        |
| Respiratory disease        | 4600-5199                                                   | J000-J999                                                   |
| Smoking-related cancer     | 1400-1509; 1570-1579;<br>1600-1639; 1650-1659;<br>1880-1899 | C000-C149; C250-C259;<br>C300-C349; C390-C399;<br>C640-C689 |
| Cancer not smoking-related | 1510-1569; 1580-1599;<br>1640-1649; 1700-1879;<br>1900-2089 | C150-C249; C260-C269;<br>C370-C389; C400-C639;<br>C690-C979 |

**Supplementary Table S2. Baseline characteristics of participants by quartile of BMI in**

**2001.** BMI: body mass index, CI: confidence interval, SEP: socioeconomic position, MD: mean difference, OR, odds ratio. <sup>a</sup>Measured age 16-25. <sup>b</sup>Interval-scale variables are summarised as means within each quartile of BMI and mean differences per 5 kg m<sup>-2</sup> of BMI from unadjusted linear regression are presented. <sup>c</sup>Binary variables are summarised as percentages within each quartile of BMI and odds ratios per 5 kg m<sup>-2</sup> of BMI from unadjusted logistic regression are presented. <sup>d</sup>Measured 2000-2002 and BMI standardised to age 63. <sup>e</sup>The analysis of smoking uptake was restricted to non-smokers at age 20 and the analysis of smoking cessation was restricted to smokers at age 20.

| Time, Measurement                      | Quartile of BMI in 2001 <sup>a</sup> |                 |                 |                 | Regression per 5 kg m <sup>-2</sup> |               |       |
|----------------------------------------|--------------------------------------|-----------------|-----------------|-----------------|-------------------------------------|---------------|-------|
|                                        | 1 <sup>st</sup>                      | 2 <sup>nd</sup> | 3 <sup>rd</sup> | 4 <sup>th</sup> | MD or OR                            | 95% CI        | N     |
| <sup>a</sup> Measured at age 20:       |                                      |                 |                 |                 |                                     |               |       |
| <sup>b</sup> BMI (kg m <sup>-2</sup> ) | 20.6                                 | 21.1            | 21.6            | 22.7            | 1.27                                | (1.18, 1.35)  | 4,841 |
| <sup>b</sup> Age (years)               | 19.6                                 | 19.6            | 19.8            | 19.7            | 0.05                                | (-0.02, 0.13) | 4,841 |
| <sup>b</sup> Height (cm)               | 170.8                                | 172.4           | 173.0           | 171.8           | 0.22                                | (-0.12, 0.56) | 4,841 |
| <sup>b</sup> Weight (kg)               | 60.1                                 | 62.8            | 64.7            | 67.0            | 3.9                                 | (3.5, 4.2)    | 4,841 |
| <sup>b</sup> Pulse rate (bpm)          | 76.0                                 | 75.7            | 76.0            | 76.2            | 0.1                                 | (-0.3, 0.5)   | 4,702 |
| <sup>b</sup> Number of siblings        | 1.47                                 | 1.63            | 1.69            | 1.57            | 0.05                                | (-0.01, 0.11) | 4,840 |
| <sup>c</sup> Female (%)                | 38.2                                 | 22.9            | 17.9            | 23.4            | 0.74                                | (0.67, 0.82)  | 4,841 |
| <sup>c</sup> First-born (%)            | 56.5                                 | 54.9            | 55.8            | 59.2            | 1.07                                | (0.98, 1.17)  | 4,841 |
| <sup>c</sup> High paternal SEP (%)     | 61.5                                 | 58.7            | 57.9            | 54.8            | 0.88                                | (0.81, 0.96)  | 4,675 |
| <sup>c</sup> Smokers (%)               | 23.2                                 | 25.0            | 26.3            | 28.4            | 1.09                                | (0.99, 1.20)  | 4,660 |
| <sup>d</sup> Measured in 2001:         |                                      |                 |                 |                 |                                     |               |       |
| <sup>b</sup> BMI (kg m <sup>-2</sup> ) | 21.5                                 | 24.1            | 26.0            | 29.8            | 5.00                                | (5.00, 5.00)  | 4,841 |
| <sup>b</sup> Age (years)               | 62.3                                 | 62.9            | 63.4            | 62.8            | 0.11                                | (-0.18, 0.41) | 4,841 |
| <sup>b</sup> Height (cm)               | 172.1                                | 173.6           | 174.1           | 172.8           | -0.03                               | (-0.39, 0.33) | 4,841 |
| <sup>b</sup> Weight (kg)               | 63.9                                 | 72.8            | 79.0            | 89.1            | 14.7                                | (14.3, 15.0)  | 4,841 |
| <sup>c</sup> Smokers (%)               | 11.7                                 | 8.4             | 8.4             | 9.2             | 0.85                                | (0.73, 0.99)  | 4,789 |
| <sup>c,c</sup> Started smoking (%)     | 30.2                                 | 34.2            | 36.1            | 39.8            | 1.26                                | (1.14, 1.40)  | 3,424 |
| <sup>c,c</sup> Stopped smoking (%)     | 72.1                                 | 84.1            | 85.2            | 82.1            | 1.49                                | (1.18, 1.89)  | 1,186 |

**Supplementary Table S3. Linear hazard ratios for all-cause and cause-specific mortality per 5 kg m<sup>-2</sup> of BMI.** BMI: body mass index, HR: hazard ratio, CI: confidence interval. BMI was measured at approximately age 20 and around 2001, when subjects were aged 49-78. Cox proportional hazards regression was used with age as the time axis. Models were adjusted for sex and date of birth (cubic splines) only. Nonlinearity was assessed by adding BMI<sup>2</sup> to the model and assessing its coefficient's departure from the null (P<sub>quadratic</sub>). BMI<sub>vertex</sub> was estimated as the BMI at which the tangent to the quadratic model was horizontal. In a convex quadratic curve (coefficient for BMI<sup>2</sup>>0), BMI<sub>vertex</sub> estimates the BMI at which mortality is minimised. BMI<sub>vertex</sub> values outside the observed range of BMI (11.8 to 44.7 kg m<sup>-2</sup>) indicate a monotonically increasing or decreasing association among the observed data and were abbreviated for ease of presentation.

| Exposure, cause of death                                                              | Deaths | HR (95% CI)       | P <sub>quadratic</sub> | Shape   | BMI <sub>vertex</sub> (95% CI) |
|---------------------------------------------------------------------------------------|--------|-------------------|------------------------|---------|--------------------------------|
| <i>BMI at age 20, follow-up from age 20 (N=11,233):</i>                               |        |                   |                        |         |                                |
| All cause                                                                             | 2,438  | 1.04 (0.95, 1.14) | 0.017                  | convex  | 21.5 (17.1, 23.6)              |
| Cardiovascular disease                                                                | 804    | 1.13 (0.96, 1.32) | 0.377                  | convex  | 18.8 (<11.8, >44.7)            |
| Respiratory disease                                                                   | 173    | 0.60 (0.42, 0.87) | 0.922                  | concave | <11.8 (<11.8, >44.7)           |
| Smoking-related cancer                                                                | 298    | 0.91 (0.70, 1.19) | 0.932                  | concave | <11.8 (<11.8, >44.7)           |
| Cancer not smoking-related                                                            | 647    | 1.22 (1.03, 1.45) | 0.378                  | convex  | 16.6 (<11.8, >44.7)            |
| <i>BMI in 2001, follow-up from 2001 (N=4,841):</i>                                    |        |                   |                        |         |                                |
| All cause                                                                             | 718    | 0.94 (0.84, 1.06) | 0.000                  | convex  | 27.8 (25.9, 30.2)              |
| Cardiovascular disease                                                                | 231    | 1.10 (0.90, 1.34) | 0.017                  | convex  | 25.9 (18.0, 29.0)              |
| Respiratory disease                                                                   | 62     | 0.93 (0.63, 1.39) | 0.507                  | convex  | 28.2 (<11.8, >44.7)            |
| Smoking-related cancer                                                                | 77     | 0.75 (0.52, 1.08) | 0.933                  | convex  | >44.7 (<11.8, >44.7)           |
| Cancer not smoking-related                                                            | 220    | 1.09 (0.89, 1.33) | 0.890                  | concave | >44.7 (<11.8, >44.7)           |
| <i>BMI at age 20, follow-up from 2001 (N=4,841):</i>                                  |        |                   |                        |         |                                |
| All cause                                                                             | 718    | 1.07 (0.90, 1.26) | 0.477                  | convex  | 20.1 (<11.8, >44.7)            |
| Cardiovascular disease                                                                | 231    | 1.16 (0.86, 1.56) | 0.476                  | convex  | 19.5 (<11.8, >44.7)            |
| Respiratory disease                                                                   | 62     | 0.77 (0.42, 1.44) | 0.502                  | concave | 20.1 (<11.8, 39.4)             |
| Smoking-related cancer                                                                | 77     | 0.85 (0.50, 1.44) | 0.954                  | convex  | 41.9 (<11.8, >44.7)            |
| Cancer not smoking-related                                                            | 220    | 1.07 (0.79, 1.44) | 0.956                  | concave | 37.5 (<11.8, >44.7)            |
| <i>BMI at age 20, follow-up from age 20, healthy non-smokers at age 20 (N=6,363):</i> |        |                   |                        |         |                                |
| All cause                                                                             | 1,108  | 1.18 (1.04, 1.35) | 0.051                  | convex  | 19.5 (<11.8, 26.2)             |
| Cardiovascular disease                                                                | 350    | 1.34 (1.06, 1.70) | 0.315                  | convex  | 16.8 (<11.8, >44.7)            |
| Respiratory disease                                                                   | 61     | 0.52 (0.28, 0.97) | 0.906                  | concave | <11.8 (<11.8, >44.7)           |
| Smoking-related cancer                                                                | 104    | 1.64 (1.09, 2.46) | 0.824                  | concave | >44.7 (<11.8, >44.7)           |
| Cancer not smoking-related                                                            | 354    | 1.21 (0.97, 1.52) | 0.632                  | convex  | 14.8 (<11.8, >44.7)            |
| <i>BMI in 2001, follow-up from 2001, never-smokers in 2001 (N=2,226):</i>             |        |                   |                        |         |                                |
| All cause                                                                             | 256    | 1.02 (0.84, 1.25) | 0.091                  | convex  | 26.1 (14.5, 35.7)              |
| Cardiovascular disease                                                                | 74     | 1.26 (0.88, 1.80) | 0.419                  | convex  | 21.9 (<11.8, >44.7)            |
| Respiratory disease                                                                   | 19     | 0.74 (0.34, 1.63) | 0.976                  | concave | <11.8 (<11.8, >44.7)           |
| Smoking-related cancer                                                                | 17     | 1.00 (0.46, 2.14) | 0.778                  | concave | 26.0 (<11.8, >44.7)            |
| Cancer not smoking-related                                                            | 99     | 1.18 (0.87, 1.58) | 0.648                  | concave | 33.1 (<11.8, >44.7)            |

**Supplementary Table S4. Linear hazard ratios for all-cause and cause-specific mortality in men only, per 5 kg m<sup>-2</sup> of BMI.** BMI: body mass index, HR: hazard ratio, CI: confidence interval. BMI was measured at approximately age 20 and around 2001, when subjects were aged 49-78. Cox proportional hazards regression was used with age as the time axis. Models were adjusted for sex, date of birth (cubic splines) and smoking behaviour at the time of BMI reporting. Nonlinearity was assessed by adding BMI<sup>2</sup> to the model and assessing its coefficient's departure from the null ( $P_{\text{quadratic}}$ ). BMI<sub>vertex</sub> was estimated as the BMI at which the tangent to the quadratic model was horizontal. In a convex quadratic curve (coefficient for BMI<sup>2</sup>>0), BMI<sub>vertex</sub> estimates the BMI at which mortality is minimised. BMI<sub>vertex</sub> values outside the observed range of BMI (11.8 to 44.7 kg m<sup>-2</sup>) indicate a monotonically increasing or decreasing association among the observed data and were abbreviated for ease of presentation.

| Exposure, cause of death                                                              | Deaths | HR (95% CI)       | $P_{\text{quadratic}}$ | Shape   | BMI <sub>vertex</sub> (95% CI) |
|---------------------------------------------------------------------------------------|--------|-------------------|------------------------|---------|--------------------------------|
| <i>BMI at age 20, follow-up from age 20 (N=8,648):</i>                                |        |                   |                        |         |                                |
| All cause                                                                             | 2,040  | 1.03 (0.93, 1.14) | 0.022                  | convex  | 21.8 (17.7, 24.3)              |
| Cardiovascular disease                                                                | 728    | 1.15 (0.97, 1.35) | 0.435                  | convex  | 18.2 (<11.8, >44.7)            |
| Respiratory disease                                                                   | 147    | 0.62 (0.41, 0.93) | 0.982                  | concave | <11.8 (<11.8, >44.7)           |
| Smoking-related cancer                                                                | 246    | 0.90 (0.67, 1.21) | 0.837                  | convex  | 28.4 (<11.8, >44.7)            |
| Cancer not smoking-related                                                            | 494    | 1.18 (0.96, 1.44) | 0.127                  | convex  | 20.1 (<11.8, 38.8)             |
| <i>BMI in 2001, follow-up from 2001 (N=3,602):</i>                                    |        |                   |                        |         |                                |
| All cause                                                                             | 603    | 1.01 (0.88, 1.15) | 0.001                  | convex  | 26.8 (24.1, 29.0)              |
| Cardiovascular disease                                                                | 206    | 1.17 (0.94, 1.46) | 0.016                  | convex  | 25.1 (15.2, 28.1)              |
| Respiratory disease                                                                   | 53     | 0.94 (0.59, 1.48) | 0.195                  | convex  | 27.5 (<11.8, >44.7)            |
| Smoking-related cancer                                                                | 61     | 0.77 (0.50, 1.19) | 0.734                  | concave | 17.7 (<11.8, >44.7)            |
| Cancer not smoking-related                                                            | 176    | 1.25 (0.99, 1.58) | 0.506                  | concave | 34.7 (<11.8, >44.7)            |
| <i>BMI at age 20, follow-up from 2001 (N=3,602):</i>                                  |        |                   |                        |         |                                |
| All cause                                                                             | 603    | 1.07 (0.88, 1.29) | 0.899                  | concave | 32.6 (<11.8, >44.7)            |
| Cardiovascular disease                                                                | 206    | 1.26 (0.92, 1.72) | 0.542                  | convex  | 17.5 (<11.8, >44.7)            |
| Respiratory disease                                                                   | 53     | 0.74 (0.38, 1.47) | 0.383                  | concave | 20.5 (<11.8, 35.0)             |
| Smoking-related cancer                                                                | 61     | 0.68 (0.36, 1.27) | 0.754                  | concave | 15.8 (<11.8, >44.7)            |
| Cancer not smoking-related                                                            | 176    | 0.99 (0.70, 1.41) | 0.805                  | concave | 21.9 (<11.8, >44.7)            |
| <i>BMI at age 20, follow-up from age 20, healthy non-smokers at age 20 (N=4,732):</i> |        |                   |                        |         |                                |
| All cause                                                                             | 877    | 1.22 (1.05, 1.42) | 0.368                  | convex  | 16.2 (<11.8, >44.7)            |
| Cardiovascular disease                                                                | 310    | 1.43 (1.11, 1.83) | 0.472                  | convex  | 13.7 (<11.8, >44.7)            |
| Respiratory disease                                                                   | 45     | 0.58 (0.28, 1.22) | 0.590                  | concave | 17.7 (<11.8, >44.7)            |
| Smoking-related cancer                                                                | 76     | 1.90 (1.18, 3.08) | 0.761                  | convex  | <11.8 (<11.8, >44.7)           |
| Cancer not smoking-related                                                            | 254    | 1.20 (0.91, 1.59) | 0.945                  | convex  | <11.8 (<11.8, >44.7)           |
| <i>BMI in 2001, follow-up from 2001, never-smokers in 2001 (N=1,513):</i>             |        |                   |                        |         |                                |
| All cause                                                                             | 207    | 1.10 (0.87, 1.39) | 0.069                  | convex  | 25.3 (<11.8, 33.4)             |
| Cardiovascular disease                                                                | 64     | 1.30 (0.86, 1.96) | 0.228                  | convex  | 23.4 (<11.8, >44.7)            |
| Respiratory disease                                                                   | 16     | 0.69 (0.27, 1.74) | 0.495                  | convex  | 29.5 (<11.8, >44.7)            |
| Smoking-related cancer                                                                | 13     | 1.40 (0.56, 3.46) | 0.767                  | concave | 32.5 (<11.8, >44.7)            |
| Cancer not smoking-related                                                            | 74     | 1.24 (0.84, 1.82) | 0.453                  | concave | 29.6 (<11.8, >44.7)            |

**Supplementary Table S5. Linear hazard ratios for all-cause and cause-specific mortality in women only, per 5 kg m<sup>-2</sup> of BMI.** BMI: body mass index, HR: hazard ratio, CI: confidence interval. BMI was measured at approximately age 20 and around 2001, when subjects were aged 49-78. Cox proportional hazards regression was used with age as the time axis. Models were adjusted for sex, date of birth (cubic splines) and smoking behaviour at the time of BMI reporting. Nonlinearity was assessed by adding BMI<sup>2</sup> to the model and assessing its coefficient's departure from the null ( $P_{\text{quadratic}}$ ). BMI<sub>vertex</sub> was estimated as the BMI at which the tangent to the quadratic model was horizontal. In a convex quadratic curve (coefficient for BMI<sup>2</sup>>0), BMI<sub>vertex</sub> estimates the BMI at which mortality is minimised. BMI<sub>vertex</sub> values outside the observed range of BMI (11.8 to 44.7 kg m<sup>-2</sup>) indicate a monotonically increasing or decreasing association among the observed data and were abbreviated for ease of presentation.

| Exposure, cause of death                                                              | Deaths | HR (95% CI)       | $P_{\text{quadratic}}$ | Shape   | BMI <sub>vertex</sub> (95% CI) |
|---------------------------------------------------------------------------------------|--------|-------------------|------------------------|---------|--------------------------------|
| <i>BMI at age 20, follow-up from age 20 (N=2,585):</i>                                |        |                   |                        |         |                                |
| All cause                                                                             | 398    | 1.10 (0.90, 1.34) | 0.477                  | convex  | 19.3 (<11.8, >44.7)            |
| Cardiovascular disease                                                                | 76     | 0.99 (0.63, 1.58) | 0.908                  | convex  | 22.4 (<11.8, >44.7)            |
| Respiratory disease                                                                   | 26     | 0.56 (0.24, 1.28) | 0.659                  | concave | 16.1 (<11.8, >44.7)            |
| Smoking-related cancer                                                                | 52     | 1.00 (0.57, 1.74) | 0.565                  | concave | 22.0 (<11.8, 41.1)             |
| Cancer not smoking-related                                                            | 153    | 1.36 (0.99, 1.85) | 0.543                  | concave | 28.7 (<11.8, >44.7)            |
| <i>BMI in 2001, follow-up from 2001 (N=1,239):</i>                                    |        |                   |                        |         |                                |
| All cause                                                                             | 115    | 0.81 (0.63, 1.04) | 0.336                  | convex  | 32.4 (<11.8, >44.7)            |
| Cardiovascular disease                                                                | 25     | 0.80 (0.47, 1.37) | 0.691                  | concave | 20.8 (<11.8, >44.7)            |
| Respiratory disease                                                                   | 9      | 1.02 (0.45, 2.32) | 0.277                  | concave | 26.0 (11.8, 40.2)              |
| Smoking-related cancer                                                                | 16     | 0.70 (0.34, 1.46) | 0.635                  | convex  | 32.0 (<11.8, >44.7)            |
| Cancer not smoking-related                                                            | 44     | 0.83 (0.56, 1.24) | 0.559                  | convex  | 31.7 (<11.8, >44.7)            |
| <i>BMI at age 20, follow-up from 2001 (N=1,239):</i>                                  |        |                   |                        |         |                                |
| All cause                                                                             | 115    | 1.03 (0.71, 1.50) | 0.074                  | convex  | 22.3 (15.1, 28.1)              |
| Cardiovascular disease                                                                | 25     | 0.58 (0.24, 1.43) | 0.890                  | concave | <11.8 (<11.8, >44.7)           |
| Respiratory disease                                                                   | 9      | 0.86 (0.19, 3.84) | 0.799                  | convex  | 23.6 (<11.8, >44.7)            |
| Smoking-related cancer                                                                | 16     | 1.47 (0.56, 3.83) | 0.785                  | convex  | 16.7 (<11.8, >44.7)            |
| Cancer not smoking-related                                                            | 44     | 1.30 (0.74, 2.30) | 0.893                  | convex  | <11.8 (<11.8, >44.7)           |
| <i>BMI at age 20, follow-up from age 20, healthy non-smokers at age 20 (N=1,631):</i> |        |                   |                        |         |                                |
| All cause                                                                             | 231    | 1.10 (0.84, 1.43) | 0.016                  | convex  | 21.8 (16.6, 24.2)              |
| Cardiovascular disease                                                                | 40     | 0.92 (0.48, 1.76) | 0.438                  | convex  | 23.1 (<11.8, 44.4)             |
| Respiratory disease                                                                   | 16     | 0.40 (0.13, 1.28) | 0.614                  | convex  | 28.3 (<11.8, >44.7)            |
| Smoking-related cancer                                                                | 28     | 1.20 (0.57, 2.53) | 0.337                  | concave | 22.9 (<11.8, 37.1)             |
| Cancer not smoking-related                                                            | 100    | 1.28 (0.87, 1.88) | 0.467                  | convex  | 18.5 (<11.8, >44.7)            |
| <i>BMI in 2001, follow-up from 2001, never-smokers in 2001 (N=713):</i>               |        |                   |                        |         |                                |
| All cause                                                                             | 49     | 0.85 (0.59, 1.23) | 0.700                  | convex  | 33.7 (<11.8, >44.7)            |
| Cardiovascular disease                                                                | 10     | 1.13 (0.54, 2.38) | 0.653                  | concave | 28.7 (<11.8, >44.7)            |
| Respiratory disease                                                                   | 3      | 0.00 (0.00, 0.00) | 0.000                  | concave | <11.8 (<11.8, <11.8)           |
| Smoking-related cancer                                                                | 4      | 0.00 (0.00, 0.00) | 0.000                  | concave | <11.8 (<11.8, <11.8)           |
| Cancer not smoking-related                                                            | 25     | 1.03 (0.64, 1.66) | 0.875                  | convex  | 24.7 (<11.8, >44.7)            |

**Supplementary Table S6. Linear hazard ratios for all-cause and cause-specific mortality per 5 kg m<sup>-2</sup> of BMI, including only those with BMI between the 5<sup>th</sup> and 95<sup>th</sup> percentiles.** BMI:

body mass index, HR: hazard ratio, CI: confidence interval. BMI was measured at approximately age 20 and around 2001, when subjects were aged 49-78. Cox proportional hazards regression was used with age as the time axis. Models were adjusted for sex, date of birth (cubic splines) and smoking behaviour at the time of BMI reporting. Nonlinearity was assessed by adding BMI<sup>2</sup> to the model and assessing its coefficient's departure from the null (P<sub>quadratic</sub>). BMI<sub>vertex</sub> was estimated as the BMI at which the tangent to the quadratic model was horizontal. In a convex quadratic curve (coefficient for BMI<sup>2</sup>>0), BMI<sub>vertex</sub> estimates the BMI at which mortality is minimised. BMI<sub>vertex</sub> values outside the observed range of BMI (11.8 to 44.7 kg m<sup>-2</sup>) indicate a monotonically increasing or decreasing association among the observed data and were abbreviated for ease of presentation.

| Exposure, cause of death                                                              | Deaths | HR (95% CI)       | P <sub>quadratic</sub> | Shape   | BMI <sub>vertex</sub> (95% CI) |
|---------------------------------------------------------------------------------------|--------|-------------------|------------------------|---------|--------------------------------|
| <i>BMI at age 20, follow-up from age 20 (N=10,118):</i>                               |        |                   |                        |         |                                |
| All cause                                                                             | 2,167  | 1.03 (0.91, 1.17) | 0.295                  | concave | 22.0 (14.4, 29.5)              |
| Cardiovascular disease                                                                | 708    | 1.26 (1.01, 1.58) | 0.638                  | concave | 25.8 (<11.8, >44.7)            |
| Respiratory disease                                                                   | 155    | 0.64 (0.40, 1.04) | 0.048                  | concave | 20.6 (16.5, 22.1)              |
| Smoking-related cancer                                                                | 272    | 0.83 (0.58, 1.19) | 0.233                  | concave | 20.7 (12.3, 29.0)              |
| Cancer not smoking-related                                                            | 575    | 1.09 (0.86, 1.39) | 0.825                  | convex  | 18.6 (<11.8, 36.0)             |
| <i>BMI in 2001, follow-up from 2001 (N=2,693):</i>                                    |        |                   |                        |         |                                |
| All cause                                                                             | 386    | 0.61 (0.45, 0.83) | 0.876                  | concave | <11.8 (<11.8, >44.7)           |
| Cardiovascular disease                                                                | 122    | 0.93 (0.53, 1.62) | 0.863                  | convex  | 24.2 (<11.8, 35.6)             |
| Respiratory disease                                                                   | 34     | 0.55 (0.20, 1.51) | 0.469                  | concave | 21.0 (<11.8, 36.7)             |
| Smoking-related cancer                                                                | 43     | 0.38 (0.16, 0.90) | 0.337                  | concave | 20.2 (<11.8, 41.7)             |
| Cancer not smoking-related                                                            | 111    | 1.18 (0.65, 2.13) | 0.679                  | concave | 23.9 (<11.8, 35.6)             |
| <i>BMI at age 20, follow-up from 2001 (N=4,359):</i>                                  |        |                   |                        |         |                                |
| All cause                                                                             | 641    | 1.09 (0.86, 1.38) | 0.491                  | concave | 22.6 (<11.8, 33.6)             |
| Cardiovascular disease                                                                | 199    | 1.10 (0.72, 1.67) | 0.107                  | concave | 21.8 (18.6, 25.7)              |
| Respiratory disease                                                                   | 58     | 0.64 (0.29, 1.43) | 0.125                  | concave | 20.9 (15.8, 25.0)              |
| Smoking-related cancer                                                                | 70     | 0.63 (0.31, 1.30) | 0.451                  | convex  | 23.1 (<11.8, 37.8)             |
| Cancer not smoking-related                                                            | 196    | 1.21 (0.79, 1.85) | 0.826                  | convex  | 17.9 (<11.8, 37.3)             |
| <i>BMI at age 20, follow-up from age 20, healthy non-smokers at age 20 (N=5,728):</i> |        |                   |                        |         |                                |
| All cause                                                                             | 978    | 1.16 (0.96, 1.41) | 0.793                  | convex  | 15.8 (<11.8, >44.7)            |
| Cardiovascular disease                                                                | 303    | 1.46 (1.04, 2.05) | 0.872                  | convex  | <11.8 (<11.8, >44.7)           |
| Respiratory disease                                                                   | 53     | 0.76 (0.33, 1.75) | 0.201                  | concave | 21.0 (15.2, 26.7)              |
| Smoking-related cancer                                                                | 95     | 1.42 (0.78, 2.59) | 0.640                  | concave | 24.0 (<11.8, 39.1)             |
| Cancer not smoking-related                                                            | 313    | 1.11 (0.80, 1.55) | 0.943                  | concave | 30.1 (<11.8, 36.2)             |
| <i>BMI in 2001, follow-up from 2001, never-smokers in 2001 (N=1,194):</i>             |        |                   |                        |         |                                |
| All cause                                                                             | 135    | 0.78 (0.45, 1.34) | 0.965                  | convex  | 40.9 (<11.8, 38.0)             |
| Cardiovascular disease                                                                | 38     | 1.27 (0.42, 3.86) | 0.144                  | concave | 22.8 (19.4, 26.3)              |
| Respiratory disease                                                                   | 12     | 0.84 (0.13, 5.35) | 0.862                  | concave | 21.4 (<11.8, 33.5)             |
| Smoking-related cancer                                                                | 9      | 0.75 (0.10, 5.52) | 0.159                  | concave | 22.2 (18.3, 25.8)              |
| Cancer not smoking-related                                                            | 48     | 1.90 (0.70, 5.13) | 0.792                  | convex  | 18.1 (<11.8, 41.4)             |

**Supplementary Table S7. Linear hazard ratios for all-cause and cause-specific mortality per 5 kg m<sup>-2</sup> of BMI, with follow-up beginning after a ten-year lag.** BMI: body mass index, HR: hazard ratio, CI: confidence interval. BMI was measured at approximately age 20 and around 2001, when subjects were aged 49-78. Cox proportional hazards regression was used with age as the time axis. Models were adjusted for sex, date of birth (cubic splines) and smoking behaviour at the time of BMI reporting. Nonlinearity was assessed by adding BMI<sup>2</sup> to the model and assessing its coefficient's departure from the null (P<sub>quadratic</sub>). BMI<sub>vertex</sub> was estimated as the BMI at which the tangent to the quadratic model was horizontal. In a convex quadratic curve (coefficient for BMI<sup>2</sup>>0), BMI<sub>vertex</sub> estimates the BMI at which mortality is minimised. BMI<sub>vertex</sub> values outside the observed range of BMI (11.8 to 44.7 kg m<sup>-2</sup>) indicate a monotonically increasing or decreasing association among the observed data and were abbreviated for ease of presentation.

| Exposure, cause of death                                                              | Deaths | HR (95% CI)       | P <sub>quadratic</sub> | Shape   | BMI <sub>vertex</sub> (95% CI) |
|---------------------------------------------------------------------------------------|--------|-------------------|------------------------|---------|--------------------------------|
| <i>BMI at age 20, follow-up from age 20 (N=10,963):</i>                               |        |                   |                        |         |                                |
| All cause                                                                             | 2,420  | 1.04 (0.95, 1.14) | 0.021                  | convex  | 21.4 (16.5, 23.7)              |
| Cardiovascular disease                                                                | 800    | 1.13 (0.97, 1.33) | 0.402                  | convex  | 18.6 (<11.8, >44.7)            |
| Respiratory disease                                                                   | 172    | 0.61 (0.42, 0.88) | 0.877                  | concave | <11.8 (<11.8, >44.7)           |
| Smoking-related cancer                                                                | 298    | 0.92 (0.71, 1.19) | 0.880                  | concave | 14.3 (<11.8, >44.7)            |
| Cancer not smoking-related                                                            | 644    | 1.21 (1.02, 1.43) | 0.411                  | convex  | 16.5 (<11.8, >44.7)            |
| <i>BMI in 2001, follow-up from 2001 (N=4,841):</i>                                    |        |                   |                        |         |                                |
| All cause                                                                             | 718    | 0.95 (0.85, 1.07) | 0.001                  | convex  | 27.7 (25.5, 30.4)              |
| Cardiovascular disease                                                                | 231    | 1.10 (0.91, 1.35) | 0.031                  | convex  | 25.5 (15.1, 29.4)              |
| Respiratory disease                                                                   | 62     | 0.95 (0.64, 1.42) | 0.544                  | convex  | 27.9 (<11.8, >44.7)            |
| Smoking-related cancer                                                                | 77     | 0.75 (0.52, 1.08) | 0.913                  | concave | <11.8 (<11.8, >44.7)           |
| Cancer not smoking-related                                                            | 220    | 1.11 (0.91, 1.36) | 0.840                  | concave | 42.3 (<11.8, >44.7)            |
| <i>BMI at age 20, follow-up from 2001 (N=4,841):</i>                                  |        |                   |                        |         |                                |
| All cause                                                                             | 718    | 1.06 (0.90, 1.26) | 0.477                  | convex  | 20.4 (<11.8, >44.7)            |
| Cardiovascular disease                                                                | 231    | 1.15 (0.86, 1.54) | 0.481                  | convex  | 19.7 (<11.8, >44.7)            |
| Respiratory disease                                                                   | 62     | 0.76 (0.41, 1.41) | 0.496                  | concave | 20.0 (<11.8, 39.6)             |
| Smoking-related cancer                                                                | 77     | 0.84 (0.49, 1.43) | 0.934                  | convex  | 36.5 (<11.8, >44.7)            |
| Cancer not smoking-related                                                            | 220    | 1.07 (0.79, 1.44) | 0.952                  | concave | 36.5 (<11.8, >44.7)            |
| <i>BMI at age 20, follow-up from age 20, healthy non-smokers at age 20 (N=6,214):</i> |        |                   |                        |         |                                |
| All cause                                                                             | 1,099  | 1.18 (1.04, 1.35) | 0.045                  | convex  | 19.6 (<11.8, 22.8)             |
| Cardiovascular disease                                                                | 348    | 1.36 (1.08, 1.72) | 0.335                  | convex  | 16.4 (<11.8, >44.7)            |
| Respiratory disease                                                                   | 61     | 0.52 (0.28, 0.97) | 0.906                  | concave | <11.8 (<11.8, >44.7)           |
| Smoking-related cancer                                                                | 104    | 1.64 (1.09, 2.46) | 0.824                  | concave | >44.7 (<11.8, >44.7)           |
| Cancer not smoking-related                                                            | 352    | 1.21 (0.96, 1.52) | 0.599                  | convex  | 15.5 (<11.8, >44.7)            |
| <i>BMI in 2001, follow-up from 2001, never-smokers in 2001 (N=2,226):</i>             |        |                   |                        |         |                                |
| All cause                                                                             | 256    | 1.02 (0.84, 1.25) | 0.091                  | convex  | 26.1 (14.5, 35.6)              |
| Cardiovascular disease                                                                | 74     | 1.26 (0.88, 1.80) | 0.419                  | convex  | 21.9 (<11.8, >44.7)            |
| Respiratory disease                                                                   | 19     | 0.74 (0.34, 1.63) | 0.976                  | concave | <11.8 (<11.8, >44.7)           |
| Smoking-related cancer                                                                | 17     | 1.00 (0.46, 2.14) | 0.778                  | concave | 26.0 (<11.8, >44.7)            |
| Cancer not smoking-related                                                            | 99     | 1.18 (0.87, 1.58) | 0.648                  | concave | 33.1 (<11.8, >44.7)            |



**Supplementary Table S8. Hazard ratios for all-cause and cause-specific mortality, relative to recommended BMI (18.5-<25 kg m<sup>-2</sup>), for underweight (<18.5 kg m<sup>-2</sup>), overweight (25-<30 kg m<sup>-2</sup>) and obesity (≥30 kg m<sup>-2</sup>), with follow-up beginning after a ten-year lag.** BMI: body mass index, DOB: date of birth, UW: underweight, RW: recommended weight, OW: overweight, Ob: obese, HR: hazard ratio, CI: confidence interval. BMI was measured at approximately age 20 and around 2001, when subjects were aged 49-78. Cox proportional hazards regression was used with age as the time axis. All models were adjusted for sex, cubic splines of DOB and smoking behaviour at the time of BMI reporting (except where smokers were excluded). Where there were no deaths in a BMI category, participants falling into that category were removed from the analysis.

| Cause of death                                                                                                  | Deaths |      |     |    | HR (95% CI) relative to RW |                   |                    |
|-----------------------------------------------------------------------------------------------------------------|--------|------|-----|----|----------------------------|-------------------|--------------------|
|                                                                                                                 | UW     | RW   | OW  | Ob | UW                         | OW                | Ob                 |
| <i>BMI at age 20, follow-up from age 20 (N = 798 UW + 9,466 RW + 660 OW + 39 Ob):</i>                           |        |      |     |    |                            |                   |                    |
| All cause                                                                                                       | 191    | 2061 | 159 | 9  | 1.21 (1.05, 1.41)          | 1.24 (1.06, 1.46) | 1.53 (0.79, 2.94)  |
| Cardiovascular disease                                                                                          | 70     | 669  | 61  | 0  | 1.43 (1.12, 1.83)          | 1.51 (1.16, 1.97) |                    |
| Respiratory disease                                                                                             | 15     | 152  | 5   | 0  | 1.36 (0.80, 2.31)          | 0.55 (0.23, 1.34) |                    |
| Smoking-related cancer                                                                                          | 17     | 264  | 15  | 2  | 0.84 (0.51, 1.37)          | 0.92 (0.55, 1.55) | 2.78 (0.69, 11.20) |
| Cancer not smoking-related                                                                                      | 42     | 551  | 46  | 5  | 0.94 (0.69, 1.29)          | 1.30 (0.97, 1.76) | 2.90 (1.20, 7.01)  |
| <i>BMI in 2001, follow-up from 2001 (N = 35 UW + 2,393 RW + 2,005 OW + 408 Ob):</i>                             |        |      |     |    |                            |                   |                    |
| All cause                                                                                                       | 10     | 351  | 281 | 76 | 1.67 (0.89, 3.14)          | 0.86 (0.74, 1.01) | 1.25 (0.98, 1.61)  |
| Cardiovascular disease                                                                                          | 3      | 104  | 92  | 32 | 1.70 (0.54, 5.37)          | 0.92 (0.69, 1.22) | 1.77 (1.19, 2.64)  |
| Respiratory disease                                                                                             | 1      | 31   | 24  | 6  | 1.80 (0.24, 13.25)         | 0.82 (0.48, 1.40) | 1.09 (0.45, 2.64)  |
| Smoking-related cancer                                                                                          | 1      | 41   | 28  | 7  | 1.24 (0.17, 9.03)          | 0.74 (0.46, 1.21) | 0.93 (0.41, 2.07)  |
| Cancer not smoking-related                                                                                      | 2      | 102  | 94  | 22 | 1.18 (0.29, 4.80)          | 1.04 (0.78, 1.38) | 1.30 (0.82, 2.07)  |
| <i>BMI at age 20, follow-up from 2001 (N = 325 UW + 4,209 RW + 288 OW + 19 Ob):</i>                             |        |      |     |    |                            |                   |                    |
| All cause                                                                                                       | 48     | 621  | 48  | 1  | 1.15 (0.86, 1.55)          | 1.34 (0.99, 1.79) | 0.47 (0.07, 3.32)  |
| Cardiovascular disease                                                                                          | 17     | 193  | 21  | 0  | 1.35 (0.82, 2.23)          | 1.94 (1.24, 3.05) |                    |
| Respiratory disease                                                                                             | 3      | 57   | 2   | 0  | 0.88 (0.28, 2.83)          | 0.66 (0.16, 2.69) |                    |
| Smoking-related cancer                                                                                          | 5      | 67   | 5   | 0  | 1.06 (0.43, 2.64)          | 1.22 (0.49, 3.04) |                    |
| Cancer not smoking-related                                                                                      | 14     | 192  | 14  | 0  | 1.03 (0.60, 1.78)          | 1.22 (0.71, 2.10) |                    |
| <i>BMI at age 20, follow-up from age 20, healthy non-smokers only (N = 466 UW + 5,338 RW + 386 OW + 24 Ob):</i> |        |      |     |    |                            |                   |                    |
| All cause                                                                                                       | 83     | 928  | 83  | 5  | 1.10 (0.87, 1.37)          | 1.51 (1.20, 1.89) | 1.49 (0.62, 3.59)  |
| Cardiovascular disease                                                                                          | 31     | 286  | 31  | 0  | 1.39 (0.96, 2.02)          | 2.00 (1.38, 2.90) |                    |
| Respiratory disease                                                                                             | 7      | 53   | 1   | 0  | 1.64 (0.74, 3.63)          | 0.33 (0.05, 2.38) |                    |
| Smoking-related cancer                                                                                          | 3      | 92   | 7   | 2  | 0.40 (0.13, 1.26)          | 1.31 (0.61, 2.83) | 6.35 (1.56, 25.79) |
| Cancer not smoking-related                                                                                      | 22     | 300  | 28  | 2  | 0.85 (0.55, 1.32)          | 1.46 (0.99, 2.16) | 1.76 (0.44, 7.08)  |
| <i>BMI in 2001, follow-up from 2001, never-smokers in 2001 (N = 16 UW + 1,170 RW + 880 OW + 160 Ob):</i>        |        |      |     |    |                            |                   |                    |
| All cause                                                                                                       | 3      | 134  | 96  | 23 | 1.58 (0.50, 5.02)          | 0.89 (0.68, 1.16) | 1.49 (0.96, 2.32)  |
| Cardiovascular disease                                                                                          | 1      | 38   | 25  | 10 | 2.21 (0.30, 16.39)         | 0.79 (0.48, 1.32) | 2.43 (1.21, 4.89)  |
| Respiratory disease                                                                                             | 0      | 12   | 6   | 1  |                            | 0.61 (0.23, 1.63) | 0.73 (0.09, 5.66)  |
| Smoking-related cancer                                                                                          | 0      | 9    | 7   | 1  |                            | 1.00 (0.37, 2.69) | 0.96 (0.12, 7.67)  |
| Cancer not smoking-related                                                                                      | 1      | 47   | 43  | 8  | 1.35 (0.18, 9.95)          | 1.17 (0.77, 1.78) | 1.39 (0.65, 2.94)  |

**Supplementary Table S9. Linear hazard ratios for all-cause and cause-specific mortality per 5 kg m<sup>-2</sup> of BMI, with additional adjustment.** BMI: body mass index, HR: hazard ratio, CI: confidence interval. BMI was measured at approximately age 20 and around 2001, when subjects were aged 49-78. Cox proportional hazards regression was used with age as the time axis. Models were adjusted for sex, date of birth (cubic splines), smoking behaviour at the time of BMI reporting, father's social class, height (cubic splines), birth order, number of siblings, pulse rate and age at menarche. Nonlinearity was assessed by adding BMI<sup>2</sup> to the model and assessing its coefficient's departure from the null (P<sub>quadratic</sub>). BMI<sub>vertex</sub> was estimated as the BMI at which the tangent to the quadratic model was horizontal. In a convex quadratic curve (coefficient for BMI<sup>2</sup>>0), BMI<sub>vertex</sub> estimates the BMI at which mortality is minimised. BMI<sub>vertex</sub> values outside the observed range of BMI (11.8 to 44.7 kg m<sup>-2</sup>) indicate a monotonically increasing or decreasing association among the observed data and were abbreviated for ease of presentation.

| Exposure, cause of death                                                              | Deaths | HR (95% CI)       | P <sub>quadratic</sub> | Shape   | BMI <sub>vertex</sub> (95% CI) |
|---------------------------------------------------------------------------------------|--------|-------------------|------------------------|---------|--------------------------------|
| <i>BMI at age 20, follow-up from age 20 (N=10,876):</i>                               |        |                   |                        |         |                                |
| All cause                                                                             | 2,397  | 1.03 (0.94, 1.13) | 0.059                  | convex  | 21.6 (14.7, 26.0)              |
| Cardiovascular disease                                                                | 793    | 1.09 (0.92, 1.27) | 0.432                  | convex  | 19.7 (<11.8, >44.7)            |
| Respiratory disease                                                                   | 171    | 0.61 (0.42, 0.89) | 0.785                  | concave | <11.8 (<11.8, >44.7)           |
| Smoking-related cancer                                                                | 294    | 0.94 (0.72, 1.23) | 0.874                  | concave | 17.1 (<11.8, >44.7)            |
| Cancer not smoking-related                                                            | 636    | 1.23 (1.03, 1.46) | 0.654                  | convex  | <11.8 (<11.8, >44.7)           |
| <i>BMI in 2001, follow-up from 2001 (N=4,702):</i>                                    |        |                   |                        |         |                                |
| All cause                                                                             | 713    | 0.95 (0.85, 1.07) | 0.001                  | convex  | 27.6 (25.5, 30.4)              |
| Cardiovascular disease                                                                | 231    | 1.10 (0.90, 1.34) | 0.037                  | convex  | 25.6 (14.5, 30.1)              |
| Respiratory disease                                                                   | 61     | 0.90 (0.60, 1.36) | 0.663                  | convex  | 30.0 (<11.8, >44.7)            |
| Smoking-related cancer                                                                | 77     | 0.73 (0.51, 1.05) | 0.913                  | concave | <11.8 (<11.8, >44.7)           |
| Cancer not smoking-related                                                            | 218    | 1.14 (0.93, 1.39) | 0.900                  | concave | >44.7 (<11.8, >44.7)           |
| <i>BMI at age 20, follow-up from 2001 (N=4,702):</i>                                  |        |                   |                        |         |                                |
| All cause                                                                             | 713    | 1.08 (0.91, 1.28) | 0.545                  | convex  | 19.3 (<11.8, >44.7)            |
| Cardiovascular disease                                                                | 231    | 1.11 (0.82, 1.49) | 0.605                  | convex  | 19.7 (<11.8, >44.7)            |
| Respiratory disease                                                                   | 61     | 0.79 (0.43, 1.48) | 0.446                  | concave | 20.5 (<11.8, 36.9)             |
| Smoking-related cancer                                                                | 77     | 0.87 (0.51, 1.48) | 0.908                  | convex  | 30.3 (<11.8, >44.7)            |
| Cancer not smoking-related                                                            | 218    | 1.15 (0.85, 1.55) | 0.806                  | concave | 29.4 (<11.8, >44.7)            |
| <i>BMI at age 20, follow-up from age 20, healthy non-smokers at age 20 (N=6,146):</i> |        |                   |                        |         |                                |
| All cause                                                                             | 1,089  | 1.17 (1.02, 1.34) | 0.052                  | convex  | 19.7 (<11.8, 26.1)             |
| Cardiovascular disease                                                                | 346    | 1.30 (1.02, 1.65) | 0.264                  | convex  | 18.1 (<11.8, >44.7)            |
| Respiratory disease                                                                   | 61     | 0.51 (0.27, 0.96) | 0.934                  | concave | <11.8 (<11.8, >44.7)           |
| Smoking-related cancer                                                                | 104    | 1.61 (1.07, 2.42) | 0.789                  | concave | 40.9 (<11.8, >44.7)            |
| Cancer not smoking-related                                                            | 348    | 1.24 (0.98, 1.56) | 0.675                  | convex  | 12.9 (<11.8, >44.7)            |
| <i>BMI in 2001, follow-up from 2001, never-smokers in 2001 (N=2,162):</i>             |        |                   |                        |         |                                |
| All cause                                                                             | 255    | 1.03 (0.84, 1.26) | 0.140                  | convex  | 26.0 (<11.8, 39.6)             |
| Cardiovascular disease                                                                | 74     | 1.21 (0.84, 1.73) | 0.506                  | convex  | 21.9 (<11.8, >44.7)            |
| Respiratory disease                                                                   | 19     | 0.71 (0.32, 1.57) | 0.891                  | concave | <11.8 (<11.8, >44.7)           |
| Smoking-related cancer                                                                | 17     | 1.06 (0.48, 2.35) | 0.749                  | concave | 27.3 (<11.8, >44.7)            |
| Cancer not smoking-related                                                            | 99     | 1.19 (0.88, 1.60) | 0.610                  | concave | 32.7 (<11.8, >44.7)            |

**Supplementary Table S10. Linear hazard ratios for all-cause and cause-specific mortality per 5 kg m<sup>-2</sup> of BMI, with those missing smoking data excluded instead of being included as a separate class.** BMI: body mass index, HR: hazard ratio, CI: confidence interval. BMI was measured at approximately age 20 and around 2001, when subjects were aged 49-78. Cox proportional hazards regression was used with age as the time axis. Models were adjusted for sex, date of birth (cubic splines) and smoking behaviour at the time of BMI reporting. Nonlinearity was assessed by adding BMI<sup>2</sup> to the model and assessing its coefficient's departure from the null (P<sub>quadratic</sub>). BMI<sub>vertex</sub> was estimated as the BMI at which the tangent to the quadratic model was horizontal. In a convex quadratic curve (coefficient for BMI<sup>2</sup>>0), BMI<sub>vertex</sub> estimates the BMI at which mortality is minimised. BMI<sub>vertex</sub> values outside the observed range of BMI (11.8 to 44.7 kg m<sup>-2</sup>) indicate a monotonically increasing or decreasing association among the observed data and were abbreviated for ease of presentation.

| Exposure, cause of death                                                              | Deaths | HR (95% CI)       | P <sub>quadratic</sub> | Shape   | BMI <sub>vertex</sub> (95% CI) |
|---------------------------------------------------------------------------------------|--------|-------------------|------------------------|---------|--------------------------------|
| <i>BMI at age 20, follow-up from age 20 (N=10,768):</i>                               |        |                   |                        |         |                                |
| All cause                                                                             | 2,347  | 1.04 (0.94, 1.14) | 0.025                  | convex  | 21.6 (16.7, 24.1)              |
| Cardiovascular disease                                                                | 765    | 1.15 (0.98, 1.35) | 0.376                  | convex  | 18.5 (<11.8, >44.7)            |
| Respiratory disease                                                                   | 168    | 0.61 (0.42, 0.88) | 0.976                  | convex  | >44.7 (<11.8, >44.7)           |
| Smoking-related cancer                                                                | 289    | 0.90 (0.69, 1.17) | 0.797                  | concave | 16.5 (<11.8, >44.7)            |
| Cancer not smoking-related                                                            | 624    | 1.17 (0.98, 1.39) | 0.490                  | convex  | 16.8 (<11.8, >44.7)            |
| <i>BMI in 2001, follow-up from 2001 (N=4,789):</i>                                    |        |                   |                        |         |                                |
| All cause                                                                             | 707    | 0.95 (0.85, 1.07) | 0.001                  | convex  | 27.6 (25.4, 30.4)              |
| Cardiovascular disease                                                                | 229    | 1.10 (0.90, 1.34) | 0.032                  | convex  | 25.6 (15.3, 29.6)              |
| Respiratory disease                                                                   | 61     | 0.96 (0.64, 1.43) | 0.547                  | convex  | 27.7 (<11.8, >44.7)            |
| Smoking-related cancer                                                                | 76     | 0.75 (0.52, 1.08) | 0.936                  | concave | <11.8 (<11.8, >44.7)           |
| Cancer not smoking-related                                                            | 217    | 1.12 (0.92, 1.37) | 0.760                  | concave | 37.1 (<11.8, >44.7)            |
| <i>BMI at age 20, follow-up from 2001 (N=4,660):</i>                                  |        |                   |                        |         |                                |
| All cause                                                                             | 695    | 1.05 (0.88, 1.24) | 0.455                  | convex  | 20.9 (<11.8, 44.3)             |
| Cardiovascular disease                                                                | 224    | 1.17 (0.87, 1.58) | 0.506                  | convex  | 19.1 (<11.8, >44.7)            |
| Respiratory disease                                                                   | 58     | 0.78 (0.41, 1.47) | 0.586                  | concave | 19.8 (<11.8, 41.2)             |
| Smoking-related cancer                                                                | 72     | 0.72 (0.41, 1.26) | 0.756                  | concave | 15.9 (<11.8, >44.7)            |
| Cancer not smoking-related                                                            | 214    | 1.04 (0.77, 1.41) | 0.939                  | convex  | 16.0 (<11.8, >44.7)            |
| <i>BMI at age 20, follow-up from age 20, healthy non-smokers at age 20 (N=6,363):</i> |        |                   |                        |         |                                |
| All cause                                                                             | 1,108  | 1.18 (1.04, 1.35) | 0.051                  | convex  | 19.5 (<11.8, 26.1)             |
| Cardiovascular disease                                                                | 350    | 1.34 (1.06, 1.70) | 0.315                  | convex  | 16.8 (<11.8, >44.7)            |
| Respiratory disease                                                                   | 61     | 0.52 (0.28, 0.97) | 0.906                  | concave | <11.8 (<11.8, >44.7)           |
| Smoking-related cancer                                                                | 104    | 1.64 (1.09, 2.46) | 0.824                  | concave | >44.7 (<11.8, >44.7)           |
| Cancer not smoking-related                                                            | 354    | 1.21 (0.97, 1.52) | 0.632                  | convex  | 14.8 (<11.8, >44.7)            |
| <i>BMI in 2001, follow-up from 2001, never-smokers in 2001 (N=2,226):</i>             |        |                   |                        |         |                                |
| All cause                                                                             | 256    | 1.02 (0.84, 1.25) | 0.091                  | convex  | 26.1 (14.5, 35.6)              |
| Cardiovascular disease                                                                | 74     | 1.26 (0.88, 1.80) | 0.419                  | convex  | 21.9 (<11.8, >44.7)            |
| Respiratory disease                                                                   | 19     | 0.74 (0.34, 1.63) | 0.976                  | concave | <11.8 (<11.8, >44.7)           |
| Smoking-related cancer                                                                | 17     | 1.00 (0.46, 2.14) | 0.778                  | concave | 26.0 (<11.8, >44.7)            |
| Cancer not smoking-related                                                            | 99     | 1.18 (0.87, 1.58) | 0.648                  | concave | 33.1 (<11.8, >44.7)            |

**Supplementary Table S11. Linear hazard ratios for all-cause and cause-specific mortality per 5 kg m<sup>-2</sup> of BMI at age 20, showing the effect of restriction to (i) healthy non-smokers, (ii) healthy subjects, and (iii) non-smokers, at age 20.** BMI: body mass index, HR: hazard ratio, CI: confidence interval. Cox proportional hazards regression was used with age as the time axis. Models were adjusted for sex, date of birth (cubic splines) and smoking behaviour at age 20. Nonlinearity was assessed by adding BMI<sup>2</sup> to the model and assessing its coefficient's departure from the null ( $P_{\text{quadratic}}$ ). BMI<sub>vertex</sub> was estimated as the BMI at which the tangent to the quadratic model was horizontal. In a convex quadratic curve (coefficient for BMI<sup>2</sup>>0), BMI<sub>vertex</sub> estimates the BMI at which mortality is minimised. BMI<sub>vertex</sub> values outside the observed range of BMI (11.8 to 44.7 kg m<sup>-2</sup>) indicate a monotonically increasing or decreasing association among the observed data and were abbreviated for ease of presentation.

| Exposure, cause of death                                                              | Deaths | HR (95% CI)       | $P_{\text{quadratic}}$ | Shape   | BMI <sub>vertex</sub> (95% CI) |
|---------------------------------------------------------------------------------------|--------|-------------------|------------------------|---------|--------------------------------|
| <i>BMI at age 20, follow-up from age 20 (N=11,233):</i>                               |        |                   |                        |         |                                |
| All cause                                                                             | 2,438  | 1.04 (0.95, 1.14) | 0.021                  | convex  | 21.5 (16.7, 23.7)              |
| Cardiovascular disease                                                                | 804    | 1.13 (0.96, 1.32) | 0.416                  | convex  | 18.6 (<11.8, >44.7)            |
| Respiratory disease                                                                   | 173    | 0.61 (0.42, 0.87) | 0.859                  | concave | <11.8 (<11.8, >44.7)           |
| Smoking-related cancer                                                                | 298    | 0.92 (0.71, 1.19) | 0.880                  | concave | 14.3 (<11.8, >44.7)            |
| Cancer not smoking-related                                                            | 647    | 1.22 (1.03, 1.45) | 0.377                  | convex  | 16.6 (<11.8, >44.7)            |
| <i>BMI at age 20, follow-up from age 20, healthy non-smokers at age 20 (N=6,363):</i> |        |                   |                        |         |                                |
| All cause                                                                             | 1,108  | 1.18 (1.04, 1.35) | 0.051                  | convex  | 19.5 (<11.8, 26.1)             |
| Cardiovascular disease                                                                | 350    | 1.34 (1.06, 1.70) | 0.315                  | convex  | 16.8 (<11.8, >44.7)            |
| Respiratory disease                                                                   | 61     | 0.52 (0.28, 0.97) | 0.906                  | concave | <11.8 (<11.8, >44.7)           |
| Smoking-related cancer                                                                | 104    | 1.64 (1.09, 2.46) | 0.824                  | concave | >44.7 (<11.8, >44.7)           |
| Cancer not smoking-related                                                            | 354    | 1.21 (0.97, 1.52) | 0.632                  | convex  | 14.8 (<11.8, >44.7)            |
| <i>BMI at age 20, follow-up from age 20, healthy subjects only (N=9,206):</i>         |        |                   |                        |         |                                |
| All cause                                                                             | 1,876  | 1.07 (0.97, 1.19) | 0.011                  | convex  | 21.2 (16.5, 23.0)              |
| Cardiovascular disease                                                                | 623    | 1.18 (0.99, 1.41) | 0.307                  | convex  | 18.7 (<11.8, >44.7)            |
| Respiratory disease                                                                   | 126    | 0.61 (0.40, 0.93) | 0.404                  | concave | 17.5 (<11.8, >44.7)            |
| Smoking-related cancer                                                                | 222    | 0.94 (0.69, 1.27) | 0.502                  | convex  | 23.4 (<11.8, 44.5)             |
| Cancer not smoking-related                                                            | 504    | 1.21 (0.99, 1.46) | 0.250                  | convex  | 18.8 (<11.8, >44.7)            |
| <i>BMI at age 20, follow-up from age 20, non-smokers only (N=7,663):</i>              |        |                   |                        |         |                                |
| All cause                                                                             | 1,421  | 1.09 (0.97, 1.23) | 0.065                  | convex  | 20.6 (<11.8, 27.5)             |
| Cardiovascular disease                                                                | 447    | 1.23 (1.00, 1.52) | 0.368                  | convex  | 17.6 (<11.8, >44.7)            |
| Respiratory disease                                                                   | 81     | 0.45 (0.26, 0.78) | 0.656                  | concave | <11.8 (<11.8, >44.7)           |
| Smoking-related cancer                                                                | 137    | 1.31 (0.90, 1.89) | 0.604                  | concave | 27.4 (<11.8, >44.7)            |
| Cancer not smoking-related                                                            | 444    | 1.20 (0.97, 1.47) | 0.806                  | convex  | <11.8 (<11.8, >44.7)           |

**Supplementary Figure S1. Hazard ratios for all-cause and cause-specific mortality, relative to the first quartile, for sex-specific quartiles of body mass index (BMI) at age 20.** Quartiles are plotted at their median values of BMI. Analyses were adjusted for sex, date of birth and smoking behaviour at age 20.

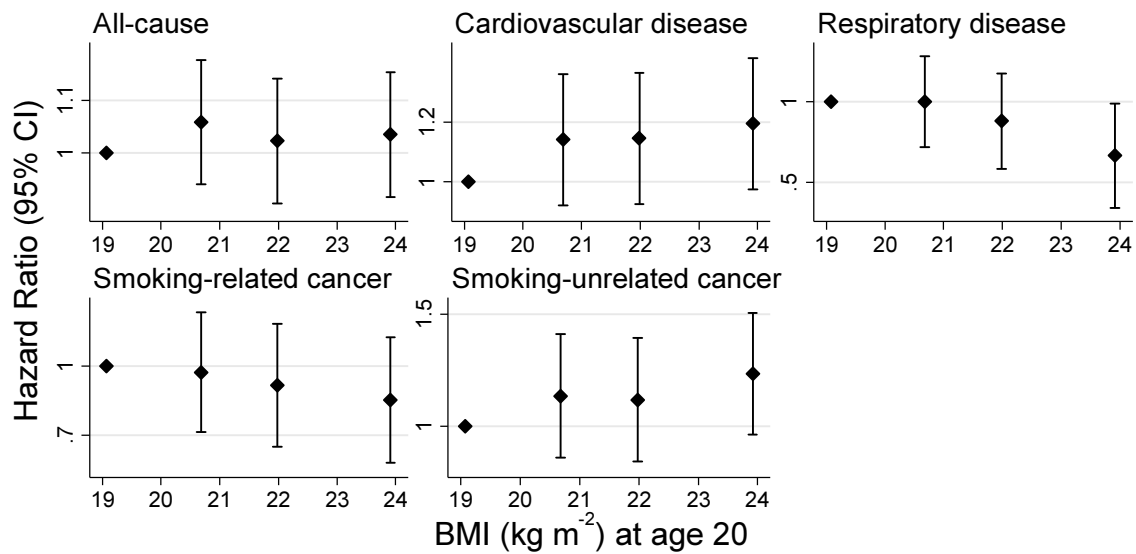

**Supplementary Figure S2. Hazard ratios for all-cause and cause-specific mortality, relative to the first quartile, for sex-specific quartiles of body mass index (BMI) in 2001.** Quartiles are plotted at their median values of BMI. Analyses were adjusted for sex, date of birth and smoking behaviour in 2001.

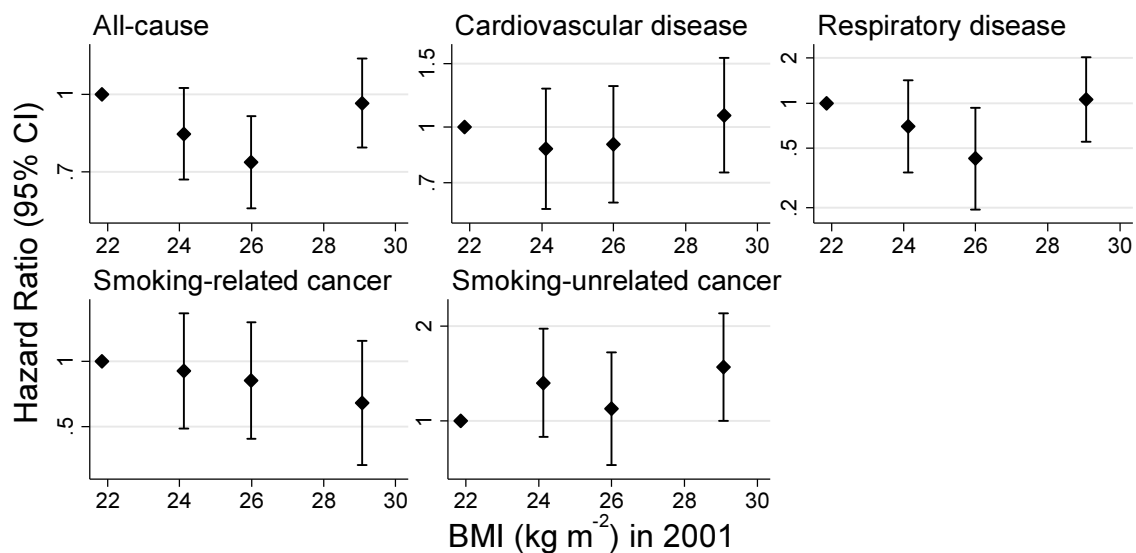

**Supplementary Figure S3. Fitted hazard ratios for all-cause and cause-specific mortality from the quadratic model of BMI at age 20, including only those with BMI between the 5<sup>th</sup> and 95<sup>th</sup> percentiles.** The midpoint of the recommended BMI range (18.5-25 kg m<sup>-2</sup>) is used as the reference point. Analyses were adjusted for sex, date of birth and smoking behaviour at age 20.

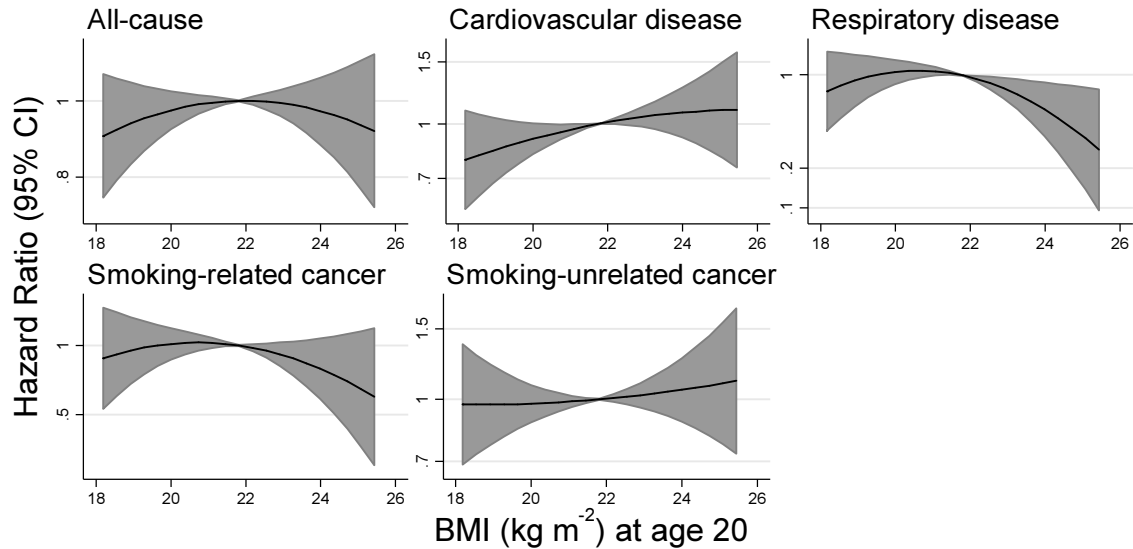

**Supplementary Figure S4. Fitted hazard ratios for all-cause and cause-specific mortality from the quadratic model of BMI at age 20, with follow-up beginning after a 10-year lag.** The midpoint of the recommended BMI range (18.5-25 kg m<sup>-2</sup>) is used as the reference point. Analyses were adjusted for sex, date of birth and smoking behaviour at age 20.

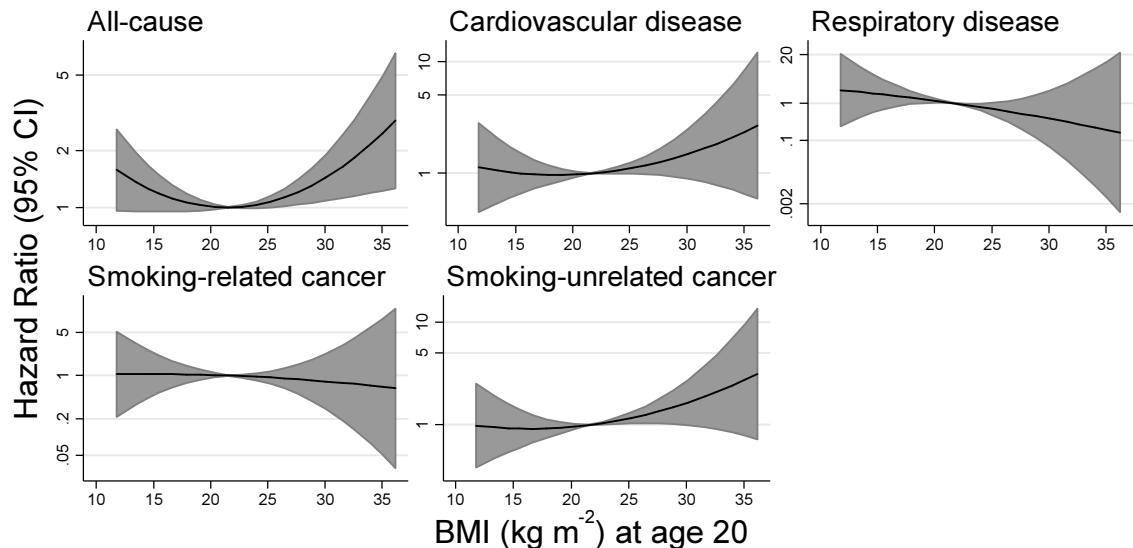

**Supplementary Figure S5. Fitted hazard ratios for all-cause and cause-specific mortality from the quadratic model of BMI at age 20, with additional adjustment.** The midpoint of the recommended BMI range (18.5-25 kg m<sup>-2</sup>) is used as the reference point. Analyses were adjusted for sex, date of birth (cubic splines), smoking behaviour at age 20, father's social class, height (cubic spline), birth order, number of siblings, pulse rate and age at menarche.

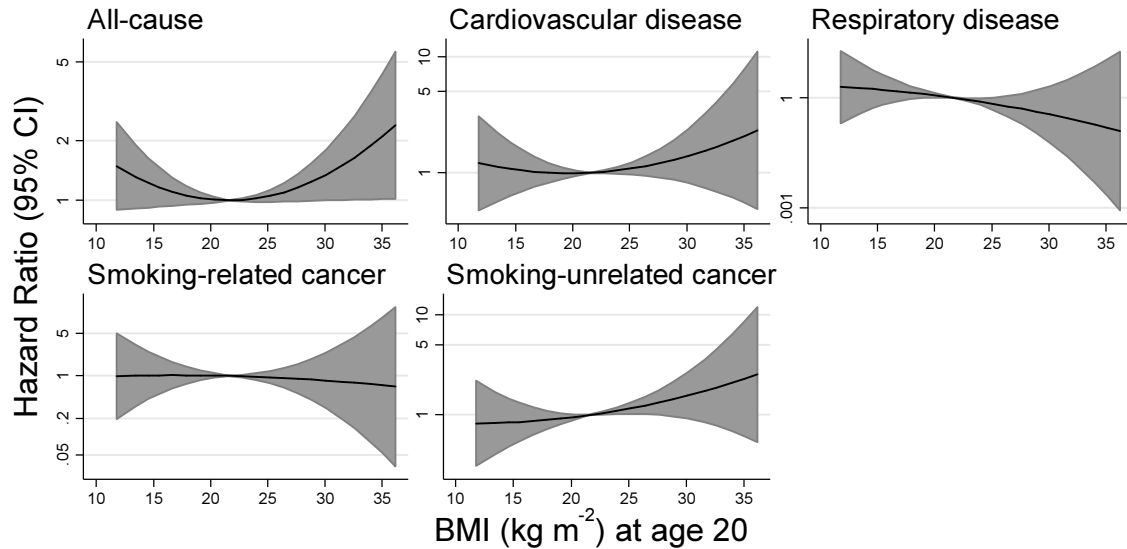

**Supplementary Figure S6. Fitted hazard ratios for all-cause and cause-specific mortality from the quadratic model of BMI at age 20, with those missing smoking data excluded instead of being included as a separate class.** The midpoint of the recommended BMI range (18.5-25 kg m<sup>-2</sup>) is used as the reference point. Analyses were adjusted for date of birth and smoking behaviour at age 20.

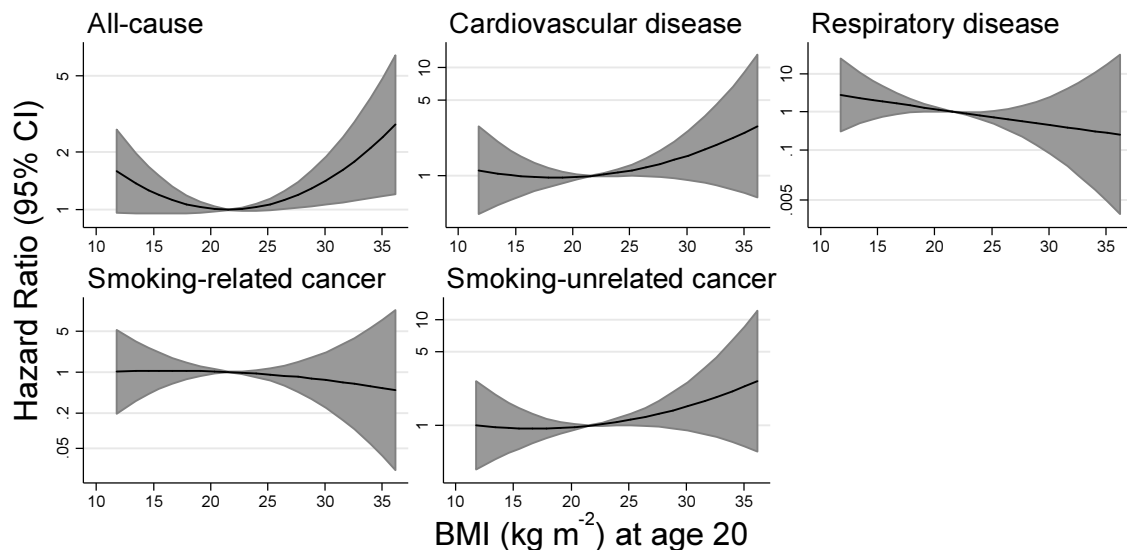

Supplement: srep36046-s1.pdf [file srep36046-s1.pdf]
